# Supplementary material for: Impact of HLA Epitope Matching on Outcomes After Unrelated Bone Marrow Transplantation
Source: PubMed Central journal article supplement (PMC8928463; doi:10.3389/fimmu.2022.811733), 2022-03-03

## Supplemental Figure S1.

### Example of estimation of HLA-DQB1 for one patient based on maximum probability algorithms (MPA)

example HLA typing: A\*26:03,\*31:01; C\*03:03, \*03:04; B\*15:01, \*40:02; DRB1\*04:05,\*15:01

HLA haplotype estimation from HLA-A, -B, -C, -DR haplotype frequency

| HLA-A, -C, -B, -DRB1<br>Haplotype (A) | Haplotype<br>frequency*<br>(A) | HLA-A, -C, -B, -DRB1<br>Haplotype (B) | Haplotype<br>frequency*<br>(B) | Frequency†<br>(AxB) | Likelihood<br>Ratio‡ |
|---------------------------------------|--------------------------------|---------------------------------------|--------------------------------|---------------------|----------------------|
| *26:03-*03:03-*15:01-*15:01           | 0.344%                         | *31:01-*03:04-*40:02-*04:05           | 0.120%                         | 0.00041280%         | 90.8%                |
| *26:03-*03:03-*15:01-*04:05           | 0.052%                         | *31:01-*03:04-*40:02-*15:01           | 0.047%                         | 0.00002444%         | 5.4%                 |
| *26:03-*03:04-*40:02-*04:05           | 0.010%                         | *31:01-*03:03-*15:01-*15:01           | 0.136%                         | 0.00001360%         | 3.0%                 |
| *26:03-*03:04-*40:02-*15:01           | 0.005%                         | *31:01-*03:03-*15:01-*04:05           | 0.047%                         | 0.00000235%         | 0.5%                 |
| *26:03-*03:04-*15:01-*04:05           | 0.005%                         | *31:01-*03:03-*40:02-*15:01           | 0.010%                         | 0.00000050%         | 0.1%                 |
| *26:03-*03:03-*40:02-*04:05           | 0.005%                         | *31:01-*03:04-*15:01-*15:01           | 0.005%                         | 0.00000025%         | 0.1%                 |
| *26:03-*03:04-*15:01-*15:01           | 0.005%                         | *31:01-*03:03-*40:02-*04:05           | 0.005%                         | 0.00000025%         | 0.1%                 |
| *26:03-*03:03-*40:02-*15:01           | 0.005%                         | *31:01-*03:04-*15:01-*04:05           | 0.005%                         | 0.00000025%         | 0.1%                 |

Estimation for HLA-DQB1 alleles from HLA-B, -DR, -DQ haplotype frequency

| HLA-B, -DRB1, -DQB1<br>Haplotype (A) | DQB1 allele<br>(A) | Haplotype<br>frequency*<br>(A) | Likelihood<br>ratio § | HLA-B, -DRB1, -DQB1<br>Haplotype (B) | DQB1 allele<br>(B) | Haplotype<br>frequency*<br>(B) | Likelihood<br>ratio § |
|--------------------------------------|--------------------|--------------------------------|-----------------------|--------------------------------------|--------------------|--------------------------------|-----------------------|
| *15:01-*15:01-*06:02                 | *06:02             | 0.568%                         | 100.0%                | *40:02-*04:05-*04:01                 | *04:01             | 0.435%                         | 81.3%                 |
|                                      |                    |                                |                       | *40:02-*04:05-*03:02                 | *03:02             | 0.067%                         | 12.5%                 |
|                                      |                    |                                |                       | *40:02-*04:05-*05:02                 | *05:02             | 0.033%                         | 6.2%                  |

\*Haplotype frequency was extracted from a family study in a Japanese population (Ikeda N, et al. Tissue Antigens 2015; 85: 252-259.). The frequency of private HLA haplotype was set as 0.005%, which was the lower limit that can be calculated from the dataset of the Japanese population.

†Frequency was calculated by multiplying haplotype frequency of A and B.

‡Likelihood ratio was calculated by the frequency of each pattern divided by the sum of all frequencies of possible patterns for HLA-A, -C, -B, -DRB1 haplotype A and B.

§Likelihood ratio was calculated by the frequency of each pattern divided by the sum of all frequencies of possible patterns for HLA-B, -DRB1, -DQB1 haplotype A or B.

**Supplementary Figure S2.** Adjusted survival and cumulative incidence curves (left) and forest plot (right) for relative risk of grade III-IV acute GVHD according to matching of HLA-C alleles, serotypes, epitopes and high-risk mismatches in patients receiving transplantation from 2000 to 2010 (A) and from 2011 to 2018 (B) are shown. Match, AMM S/EM, SMM EM, EMM HRM, other HRMM, rec1402MM represent HLA-C allele-matched patients, HLA-C allele- mismatched patients without antigen mismatches and EMM, HLA-C antigen-mismatched patients without EMM, HLA-C eplet-mismatched patients without high-risk mismatches, Patients with high-risk mismatches other than patient mismatched HLA-C\*14:02, and Patients with patient mismatched HLA-C\*14:02, respectively.

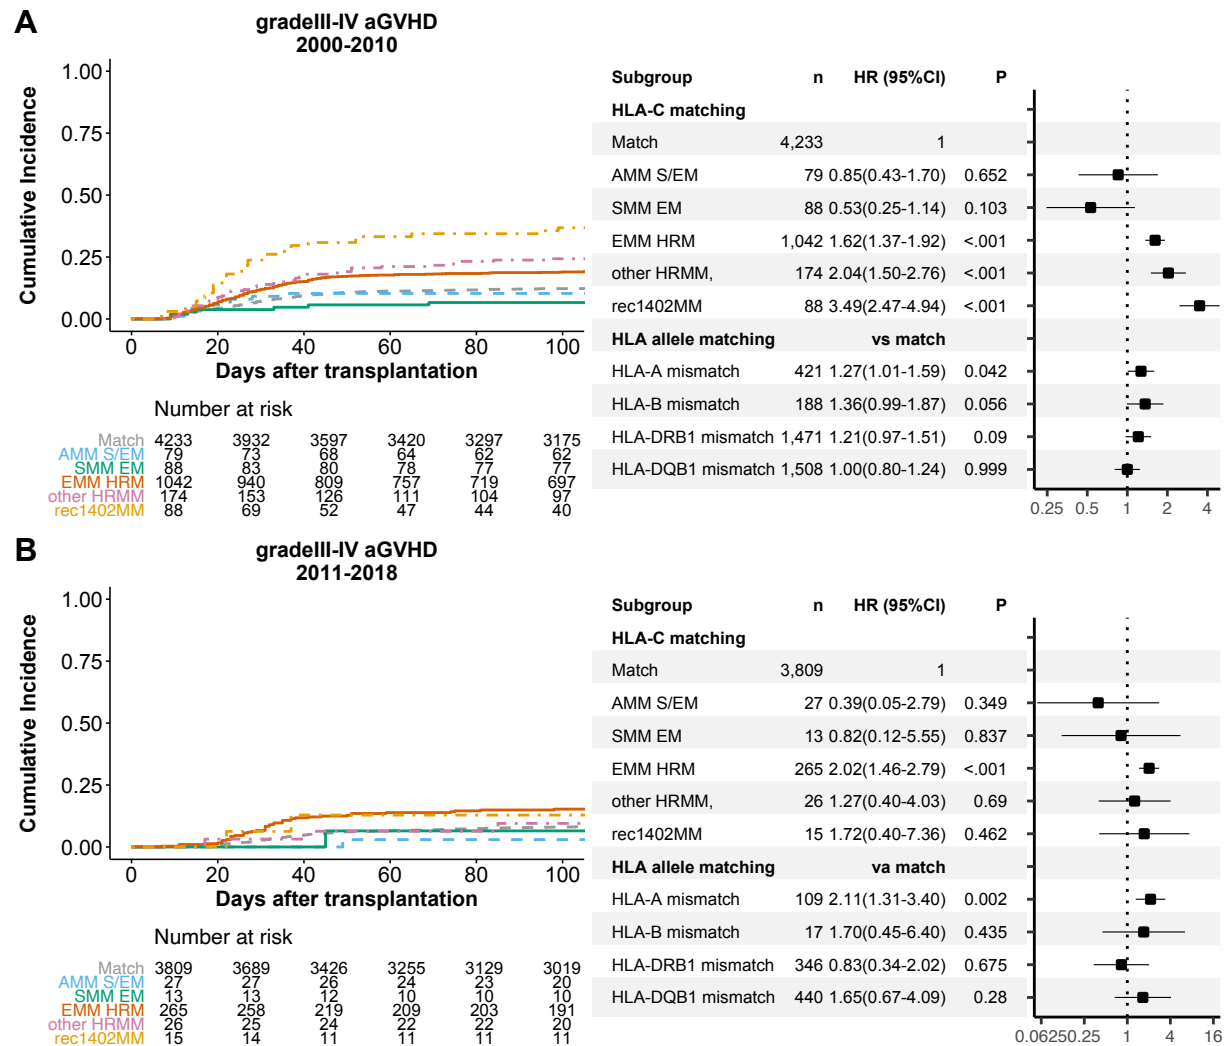

Supplement: Image_1.pdf [file Image_1.pdf]
