# Supplementary material for: Impact of HLA Epitope Matching on Outcomes After Unrelated Bone Marrow Transplantation
Source: Front Immunol. 2022 Mar 3;13:811733. doi: 10.3389/fimmu.2022.811733 (PMC8928463; doi:10.3389/fimmu.2022.811733)
Supplement: Supplementary file 2 [file Table_1.xlsx]

## Sheet: Supplementary Table　1
Supplementary Table S1. Multivariate analysis for cGVHD, extensive cGVHD and mortality rate.
Category	cGVHD				extensive cGVHD				Relapse
	n	HR	95%CI	P	n	HR	95%CI	P	n	HR	95%CI	P
HLA allele matching
10/10	6122	1.00			6136	1.00			6156	1.00
9/10 or less
SM CI/II-lo	458	0.85	0.72-1.02	.079	462	0.89	0.72-1.11	.294	478	1.03	0.86-1.23	.756
SMM CI/II-lo	116	0.99	0.72-1.37	.950	116	1.09	0.74-1.61	.654	122	0.71	0.49-1.04	.082
CI-hi/CII-lo†	1109	1.04	0.93-1.16	.536	1112	1.18	1.03-1.35	.018	1151	0.81	0.71-0.92	.002
CI-lo/CII-hi†	1326	1.00	0.90-1.11	.990	1328	0.98	0.85-1.12	.740	1350	0.95	0.85-1.07	.402
CI/II-hi†	461	1.14	0.97-1.33	.116	464	1.29	1.06-1.56	.009	503	0.82	0.68-1.00	.046
* GVH direction
† Irrespective of serotype matching status
Abbreviations: cGVHD, chronic graft-versus-host disease; SM CI/II-lo, serotype-matched recipient-donor pairs with low EMM in class I and class II; SMM CI/II-lo, serotype-mismatched recipient-donor pairs with low EMM in class I and class II; CI-hi/CII-lo, recipient-donor pairs with high class I EMM and low class II EMM; CI-lo/CII-hi, recipient-donor pairs with low class I EMM and high class II EMM…
