# Supplementary material for: Impact of HLA Epitope Matching on Outcomes After Unrelated Bone Marrow Transplantation
Source: Front Immunol. 2022 Mar 3;13:811733. doi: 10.3389/fimmu.2022.811733 (PMC8928463; doi:10.3389/fimmu.2022.811733)
Supplement: Supplementary file 3 [file Table_2.xlsx]

## Sheet: Table1
Supplementary Table S2. Association of other variables than HLA eplet matching with transplantation outcomes
		gradeII-IV aGVHD				gradeIII-IV aGVHD				Non-Relapse Mortality				Overall Survival				Neutrophil Engraftment				Platelet Engraftment				relapse				cGVHD				extensive cGVHD
		n	HR	95%CI	P	n	HR	95%CI	P	n	HR	95%CI	P	n	HR	95%CI	P	n	HR	95%CI	P	n	HR	95%CI	P	n	HR	95%CI	P	n	HR	95%CI	P	n	HR	95%CI	P
anti HLA antibodies, no. (%)	Not detected	2139	1.00			2139	1.00			2100	1.00			2140	1.00			2140	1.00			2135	1.00			2100	1.00			2133	1.00			2134	1.00
	DNSA	452	1.02	0.86-1.20	.853	452	0.71	0.50-1.01	.059	448	0.93	0.75-1.15	.493	452	1.02	0.88-1.18	.805	453	1.03	0.95-1.12	.494	453	0.89	0.80-0.98	.024	448	1.09	0.90-1.32	.386	452	1.49	1.27-1.76	<.001	452	1.42	1.13-1.77	.002
	DSA	25	1.10	0.62-1.93	.751	25	1.01	0.32-3.22	.986	25	1.28	0.63-2.61	.494	25	1.09	0.63-1.88	.767	25	0.62	0.42-0.91	.014	25	0.58	0.38-0.87	.008	25	0.95	0.37-2.42	.913	25	0.89	0.42-1.87	.760	25	1.47	0.66-3.29	.345
DQB1 typing method, no. (%)	PCR-SBT	5079	1.00			5088	1.00			5063	1.00			5205	1.00			5193	1.00			3320	1.00			5063	1.00			4835	1.00			4859	1.00
	MPA	4771	0.82	0.72-0.94	.005	4771	0.79	0.60-1.04	.087	4697	0.98	0.82-1.17	.797	4778	0.99	0.87-1.11	.816	4778	0.88	0.81-0.95	.002	4763	0.94	0.86-1.03	.176	4697	1.00	0.85-1.17	.971	4757	1.14	0.99-1.31	.074	4759	1.25	1.05-1.49	.014
Patient age, y	16-24	935	1.00			936	1.00			931	1.00			952	1.00			950	1.00			652	1.00			931	1.00			904	1.00			908	1.00
	25-50	4598	1.00	0.89-1.11	.938	4604	0.92	0.76-1.12	.412	4565	1.24	1.07-1.45	.005	4677	1.11	0.99-1.23	.067	4668	0.94	0.88-1.00	.048	3480	0.86	0.79-0.94	<.001	4565	0.92	0.80-1.06	.264	4441	1.10	0.97-1.24	.140	4457	1.24	1.05-1.46	.010
	>51	4317	1.00	0.88-1.13	.970	4319	0.93	0.75-1.15	.481	4264	1.92	1.63-2.26	<.001	4354	1.56	1.39-1.76	<.001	4353	0.90	0.84-0.97	.004	3951	0.82	0.75-0.90	<.001	4264	0.90	0.77-1.05	.181	4247	1.05	0.91-1.20	.503	4253	1.22	1.02-1.46	.028
Donor age, y	20-34	4143	1.00			4145	1.00			4104	1.00			4209	1.00			4203	1.00			3215	1.00			4104	1.00			4021	1.00			4032	1.00
	35-55	5610	1.26	1.18-1.34	<.001	5617	1.32	1.17-1.48	<.001	5557	1.25	1.15-1.36	<.001	5673	1.16	1.09-1.22	<.001	5667	1.03	0.99-1.07	.217	4771	1.01	0.96-1.06	.703	5557	0.95	0.88-1.03	.217	5479	1.07	1.00-1.15	.062	5492	1.18	1.07-1.29	<.001
Transplant year	2000-2005	2879	1.00			2888	1.00			2897	1.00			3007	1.00			2995	1.00			1107	1.00			2897	1.00			2649	1.00			2673	1.00
	2006-2010	2816	0.89	0.79-1.00	.053	2816	0.81	0.66-1.00	.053	2773	0.85	0.73-1.00	.045	2817	0.93	0.84-1.04	.218	2819	1.02	0.95-1.11	.551	2819	1.07	0.98-1.17	.143	2773	1.10	0.95-1.28	.198	2796	0.69	0.61-0.79	<.001	2797	0.63	0.53-0.74	<.001
	2011-2018	4155	1.03	0.86-1.25	.717	4155	0.91	0.64-1.30	.602	4090	0.79	0.62-1.01	.058	4159	0.86	0.72-1.01	.066	4157	1.02	0.91-1.14	.724	4157	1.12	0.98-1.27	.091	4090	1.01	0.81-1.26	.926	4147	0.59	0.49-0.72	<.001	4148	0.47	0.37-0.60	<.001
Sex matching, no. (%)	Female Match	1541	1.00	9813		1542	1.00			1537	1.00			1564	1.00			1562	1.00			1200	1.00			1537	1.00			1502	1.00			1507	1.00
	Male Match	4333	1.16	1.06-1.28	.002	4339	1.84	1.52-2.23	<.001	4293	1.22	1.08-1.38	.001	4398	1.18	1.09-1.29	<.001	4392	1.13	1.07-1.20	<.001	3543	0.98	0.91-1.06	.620	4293	1.01	0.90-1.13	.886	4208	1.04	0.94-1.15	.497	4221	1.15	1.00-1.31	.042
	Male to Female	2386	1.14	1.02-1.26	.016	2387	1.67	1.36-2.05	<.001	2357	1.09	0.95-1.25	.201	2407	1.02	0.93-1.13	.612	2406	1.21	1.13-1.28	<.001	2062	1.09	1.01-1.18	.035	2357	0.94	0.83-1.07	.381	2341	0.96	0.86-1.08	.501	2347	1.05	0.90-1.21	.544
	Female to Male	1562	1.11	0.99-1.24	.078	1563	1.47	1.18-1.85	<.001	1544	1.34	1.16-1.53	<.001	1584	1.25	1.13-1.38	<.001	1581	1.02	0.96-1.09	.532	1250	0.89	0.82-0.97	.009	1544	1.01	0.88-1.15	.937	1513	1.20	1.07-1.35	.003	1515	1.37	1.18-1.60	<.001
ABO matching, no. (%)	Match	5360	1.00			5366	1.00			5303	1.00			5423	1.00			5416	1.00			4422	1.00			5303	1.00			5225	1.00			5239	1.00
	Minor Mismatch	1914	1.03	0.95-1.12	.502	1914	1.02	0.88-1.19	.757	1892	0.99	0.89-1.10	.885	1937	1.03	0.95-1.11	.491	1937	0.94	0.89-0.98	.009	1547	0.93	0.87-0.99	.023	1892	1.05	0.95-1.16	.370	1872	1.06	0.97-1.16	.172	1877	1.11	0.99-1.24	.078
	Major Mismatch	1605	0.97	0.89-1.06	.487	1608	1.07	0.92-1.25	.366	1594	1.19	1.07-1.32	.002	1630	1.13	1.04-1.22	.003	1627	0.89	0.84-0.94	<.001	1337	0.83	0.77-0.88	<.001	1594	0.96	0.86-1.08	.515	1552	0.96	0.87-1.06	.451	1558	0.99	0.88-1.12	.898
	Major and Minor Mismatch	934	1.02	0.92-1.14	.709	934	0.96	0.79-1.18	.716	933	0.94	0.82-1.08	.397	953	1.02	0.92-1.12	.718	952	0.90	0.84-0.96	.001	751	0.89	0.82-0.96	.005	933	1.12	0.99-1.28	.076	906	1.06	0.93-1.19	.382	907	1.07	0.92-1.25	.377
Diagnosis, no. (%)	AML	3860	1.00			3863	1.00			3840	1.00			3916	1.00			3912	1.00			3217	1.00			3840	1.00			3777	1.00			3785	1.00
	ALL	1892	1.19	1.09-1.30	<.001	1895	1.10	0.94-1.30	.230	1872	1.10	0.98-1.24	.102	1913	1.00	0.92-1.09	.940	1908	1.00	0.95-1.06	.860	1532	0.87	0.82-0.93	<.001	1872	0.94	0.84-1.05	.254	1853	0.99	0.89-1.09	.767	1855	0.95	0.84-1.08	.413
	MDS	1320	0.99	0.89-1.10	.802	1321	1.10	0.92-1.32	.282	1310	1.19	1.06-1.35	.005	1333	0.69	0.63-0.76	<.001	1334	0.97	0.91-1.03	.311	1128	0.92	0.85-0.99	.031	1310	0.45	0.39-0.52	<.001	1287	1.22	1.09-1.35	<.001	1289	1.17	1.02-1.34	.023
	CML/MPN	901	1.03	0.92-1.16	.611	902	1.12	0.92-1.37	.267	881	1.11	0.97-1.28	.139	919	0.74	0.67-0.83	<.001	915	0.88	0.82-0.94	<.001	594	0.79	0.72-0.87	<.001	881	0.60	0.51-0.71	<.001	853	1.15	1.01-1.30	.029	861	1.15	0.99-1.34	.072
	ML/MM	1877	1.17	1.07-1.28	<.001	1878	0.97	0.82-1.14	.686	1857	1.12	1.00-1.26	.048	1902	0.99	0.91-1.07	.783	1902	1.10	1.04-1.16	.001	1612	0.89	0.83-0.96	.001	1857	0.93	0.83-1.04	.193	1822	1.01	0.91-1.12	.824	1828	0.97	0.85-1.10	.623
Disease stage, no. (%)	Standard	5933	1.00			5939	1.00			5893	1.00			5981	1.00			5979	1.00			4864	1.00			5893	1.00			5811	1.00			5828	1.00
	High	3676	0.98	0.91-1.05	.475	3677	1.22	1.07-1.38	.002	3620	1.07	0.98-1.17	.149	3726	2.25	2.12-2.39	<.001	3721	0.76	0.73-0.79	<.001	3177	0.71	0.67-0.75	<.001	3620	3.06	2.81-3.33	<.001	3580	0.74	0.69-0.81	<.001	3586	0.83	0.75-0.91	<.001
Conditioning, no. (%)	MAC	6703	1.00			6710	1.00			6648	1.00			6797	1.00			6788	1.00			5345	1.00			6648	1.00			6522	1.00			6540	1.00
	RIC	3009	0.94	0.87-1.02	.126	3010	1.01	0.88-1.17	.849	2976	0.93	0.84-1.03	.152	3032	0.90	0.84-0.97	.004	3033	0.99	0.94-1.04	.772	2720	1.06	0.99-1.12	.082	2976	1.03	0.93-1.13	.615	2954	0.96	0.87-1.05	.323	2961	0.96	0.86-1.08	.484
Total body irradiation, no. (%)	No	2458	1.00			2458	1.00			2429	1.00			2463	1.00			2464	1.00			2394	1.00			2429	1.00			2443	1.00			2445	1.00
	Yes	7064	1.02	0.95-1.10	.574	7071	1.15	0.99-1.33	.069	7000	1.10	0.99-1.22	.064	7160	1.07	0.99-1.14	.078	7149	0.92	0.88-0.97	.001	5680	0.97	0.92-1.03	.276	7000	0.94	0.86-1.04	.225	6864	0.97	0.90-1.06	.531	6886	1.00	0.90-1.12	.961
in vivo T cell depletion, no. (%)	No	9410	1.00			9419	1.00			9318	1.00			9538	1.00			9526	1.00			7677	1.00			9318	1.00			9155	1.00			9182	1.00
	Yes	440	0.61	0.51-0.74	<.001	440	0.60	0.43-0.83	.002	442	0.79	0.64-0.97	.024	445	0.78	0.67-0.91	.001	445	1.10	1.00-1.22	.052	406	1.02	0.91-1.14	.727	442	0.95	0.78-1.16	.636	437	0.82	0.68-0.99	.042	436	0.72	0.56-0.92	.010
GVHD prophylaxis, no. (%)	MTX	9304	1.00			9312	1.00			9213	1.00			9416	1.00			9407	1.00			7607	1.00			9213	1.00			9052	1.00			9077	1.00
	MMF	239	1.02	0.83-1.25	.868	239	1.42	1.01-2.00	.043	235	1.12	0.87-1.44	.388	239	1.17	0.97-1.40	.095	239	1.50	1.28-1.75	<.001	239	1.06	0.92-1.23	.423	235	1.00	0.77-1.29	.973	238	1.13	0.91-1.39	.276	239	1.13	0.86-1.49	.376
	Others	307	0.98	0.81-1.18	.807	308	1.36	1.02-1.82	.039	312	1.36	1.11-1.67	.003	328	1.18	1.02-1.38	.030	325	1.40	1.21-1.63	<.001	237	0.91	0.78-1.07	.253	312	0.85	0.67-1.08	.183	302	0.70	0.55-0.88	.003	302	0.76	0.56-1.02	.070
cell dose, no. (%)	<2.0	1941	1.00			1942	1.00			1910	1.00			1963	1.00			1960	1.00			1703	1.00			1910	1.00			1905	1.00			1908	1.00
	2.0-3.9	6345	1.03	0.95-1.12	.458	6350	1.07	0.92-1.24	.389	6282	0.93	0.84-1.03	.189	6415	0.88	0.82-0.95	<.001	6412	1.37	1.31-1.44	<.001	5347	1.48	1.40-1.57	<.001	6282	0.89	0.81-0.98	.021	6193	1.09	1.00-1.20	.062	6212	1.12	0.99-1.26	.065
	4.0-	726	1.01	0.88-1.16	.862	726	1.08	0.85-1.38	.524	725	0.95	0.81-1.13	.572	729	0.87	0.77-0.98	.026	729	1.46	1.34-1.59	<.001	601	1.65	1.48-1.85	<.001	725	0.85	0.72-1.01	.068	710	1.23	1.06-1.42	.006	711	1.18	0.98-1.42	.089
CMV serostatus, no. (%)	R-D-	606	1.00			606	1.00			599	1.00			606	1.00			606	1.00			603	1.00			599	1.00			603	1.00			604	1.00
	R+D-	2099	1.00	0.87-1.15	1.000	2099	1.02	0.77-1.34	.903	2079	1.11	0.91-1.35	.322	2099	1.00	0.87-1.14	.978	2099	1.05	0.96-1.14	.276	2094	0.93	0.84-1.03	.151	2079	0.97	0.81-1.17	.775	2088	1.11	0.94-1.30	.220	2088	1.05	0.86-1.29	.645
	R-D+	697	0.89	0.75-1.07	.218	697	0.86	0.61-1.21	.396	685	1.10	0.86-1.39	.447	698	1.03	0.88-1.22	.714	699	1.04	0.94-1.15	.448	695	0.99	0.88-1.12	.917	685	1.05	0.85-1.30	.659	691	1.05	0.86-1.27	.648	693	1.03	0.81-1.31	.819
	R+D+	3536	1.06	0.92-1.21	.426	3536	1.07	0.83-1.40	.597	3473	1.10	0.91-1.33	.316	3539	1.06	0.93-1.21	.386	3541	1.03	0.95-1.12	.442	3515	0.94	0.85-1.03	.186	3473	1.10	0.92-1.30	.295	3515	1.10	0.94-1.29	.221	3519	1.02	0.84-1.25	.816
HCT-CI, no. (%)	0	4157	1.00			4158	1.00			4102	1.00			4163	1.00			4161	1.00			4114	1.00			4102	1.00			4134	1.00			4138	1.00
	1-2	1676	1.12	1.02-1.22	.015	1676	1.10	0.92-1.30	.291	1641	1.17	1.04-1.31	.010	1677	1.22	1.12-1.32	<.001	1678	0.92	0.87-0.97	.002	1652	0.85	0.79-0.90	<.001	1641	1.11	0.99-1.23	.064	1663	0.97	0.88-1.07	.582	1664	0.93	0.82-1.06	.281
	3>=	955	1.04	0.93-1.17	.461	955	1.08	0.87-1.33	.477	943	1.30	1.13-1.49	<.001	955	1.33	1.20-1.47	<.001	955	0.93	0.86-0.99	.027	949	0.76	0.70-0.83	<.001	943	1.04	0.90-1.19	.587	955	0.91	0.80-1.03	.130	955	0.85	0.72-1.01	.060
Performance Status, no. (%)	0-1	8385	1.00			8392	1.00			8293	1.00			8453	1.00			8453	1.00			7365	1.00			8293	1.00			8229	1.00			8248	1.00
	2-4	737	0.70	0.61-0.80	<.001	737	1.05	0.85-1.30	.652	735	1.42	1.23-1.65	<.001	757	2.21	2.02-2.42	<.001	757	0.59	0.54-0.64	<.001	630	0.49	0.43-0.54	<.001	735	1.48	1.30-1.68	<.001	719	0.63	0.53-0.75	<.001	719	0.63	0.51-0.79	<.001
Abbreviations: HLA, human leukocyte antigen; AML, acute myeloid leukemia; ALL, acute lymphoblastic leukemia; MDS, myelodysplastic syndrome; CML, chronic myeloid leukemia; MPN, myeloproliferative neoplasm; ML, malignant lymphoma; MM, multiple myeloma; MAC, myeloablative conditioning; RIC, reduced intensity conditioning; GVHD, graft-versus-host disease; MTX, methotrexate; MMF, mycophenolate mofetil…
