# Supplementary material for: Impact of HLA Epitope Matching on Outcomes After Unrelated Bone Marrow Transplantation
Source: Front Immunol. 2022 Mar 3;13:811733. doi: 10.3389/fimmu.2022.811733 (PMC8928463; doi:10.3389/fimmu.2022.811733)
Supplement: Supplementary file 4 [file Table_3.xlsx]

## Sheet: Sheet1
Supplementary Table S3. Correlation of HLA locus matching for alleles and eplets
Locus matching for alleles and eplets		HLA-A, no. (%)*				HLA-B, no. (%)*				HLA-C, no. (%)*				HLA-DRB1, no. (%)*				HLA-DQB1, no. (%)
		Match	AMM-EM	AMM-EMM	correlation	Match	AMM-EM	AMM-EMM	correlation	Match	AMM-EM	AMM-EMM	correlation	Match	AMM-EM	AMM-EMM	correlation	Match	AMM-EM	AMM-EMM	correlation
		N=9,448	N=431	N=112		N=9,775	N=176	N=40		N=8,126	N=262	N=1,603		N=8,047	N=204	N=1,740		N=7,997	N=315	N=1,679
HLA-A, no. (%)	Match					9,267 (95%)	145 (82%)	36 (90%)	0.0614	7,764 (96%)	238 (91%)	1,446 (90%)	0.0831	7,628 (95%)	185 (91%)	1,635 (94%)	0.0075	7,592 (95%)	298 (95%)	1,558 (93%)	0.0221
	AMM-EM					405 ( 4%)	23 (13%)	3 ( 8%)		286 ( 4%)	19 ( 7%)	126 ( 8%)		323 ( 4%)	16 ( 8%)	92 ( 5%)		309 ( 4%)	15 ( 5%)	107 ( 6%)
	AMM-EMM					103 ( 1%)	8 ( 5%)	1 ( 2%)		76 ( 1%)	5 ( 2%)	31 ( 2%)		96 ( 1%)	3 ( 1%)	13 ( 1%)		96 ( 1%)	2 ( 1%)	14 ( 1%)
HLA-B, no. (%)	Match	9,267 (98%)	405 (94%)	103 (92%)	0.0614					8,060 (99%)	254 (97%)	1,461 (91%)	0.193	7,899 (98%)	197 (97%)	1,679 (96%)	0.0417	7,858 (98%)	305 (97%)	1,612 (96%)	0.0555
	AMM-EM	145 ( 2%)	23 ( 5%)	8 ( 7%)						54 ( 1%)	8 ( 3%)	114 ( 7%)		120 ( 1%)	6 ( 3%)	50 ( 3%)		113 ( 1%)	8 ( 3%)	55 ( 3%)
	AMM-EMM	36 ( 0%)	3 ( 1%)	1 ( 1%)						12 ( 0%)	0 ( 0%)	28 ( 2%)		28 ( 0%)	1 ( 0%)	11 ( 1%)		26 ( 0%)	2 ( 1%)	12 ( 1%)
HLA-C, no. (%)	Match	7,764 (82%)	286 (66%)	76 (68%)	0.0831	8,060 (82%)	54 (31%)	12 (30%)	0.193					6,790 (84%)	123 (60%)	1,213 (70%)	0.1489	6,764 (85%)	254 (81%)	1,108 (66%)	0.1737
	AMM-EM	238 ( 3%)	19 ( 4%)	5 ( 4%)		254 ( 3%)	8 ( 5%)	0 ( 0%)						182 ( 2%)	8 ( 4%)	72 ( 4%)		175 ( 2%)	11 ( 3%)	76 ( 5%)
	AMM-EMM	1,446 (15%)	126 (29%)	31 (28%)		1,461 (15%)	114 (65%)	28 (70%)						1,075 (13%)	73 (36%)	455 (26%)		1,058 (13%)	50 (16%)	495 (29%)
HLA-DRB1, no. (%)	Match	7,628 (81%)	323 (75%)	96 (86%)	0.0075	7,899 (81%)	120 (68%)	28 (70%)	0.0417	6,790 (84%)	182 (69%)	1,075 (67%)	0.1489					7,731 (97%)	198 (63%)	118 ( 7%)	0.848
	AMM-EM	185 ( 2%)	16 ( 4%)	3 ( 3%)		197 ( 2%)	6 ( 3%)	1 ( 2%)		123 ( 2%)	8 ( 3%)	73 ( 5%)						65 ( 1%)	24 ( 8%)	115 ( 7%)
	AMM-EMM	1,635 (17%)	92 (21%)	13 (12%)		1,679 (17%)	50 (28%)	11 (28%)		1,213 (15%)	72 (27%)	455 (28%)						201 ( 3%)	93 (30%)	1,446 (86%)
HLA-DQB1, no. (%)	Match	7,592 (80%)	309 (72%)	96 (86%)	0.0221	7,858 (80%)	113 (64%)	26 (65%)	0.0555	6,764 (83%)	175 (67%)	1,058 (66%)	0.1737	7,731 (96%)	65 (32%)	201 (12%)	0.848
	AMM-EM	298 ( 3%)	15 ( 3%)	2 ( 2%)		305 ( 3%)	8 ( 5%)	2 ( 5%)		254 ( 3%)	11 ( 4%)	50 ( 3%)		198 ( 2%)	24 (12%)	93 ( 5%)
	AMM-EMM	1,558 (16%)	107 (25%)	14 (12%)		1,612 (16%)	55 (31%)	12 (30%)		1,108 (14%)	76 (29%)	495 (31%)		118 ( 1%)	115 (56%)	1,446 (83%)
Abbreviations: HLA, human leukocyte antigen; AMM, allele mismatch; EM, eplet match; EMM, eplet mismatch
*Perxentage is calculated as percentage of a fraction within each locus in columns.
