# Supplementary material for: Impact of HLA Epitope Matching on Outcomes After Unrelated Bone Marrow Transplantation
Source: Front Immunol. 2022 Mar 3;13:811733. doi: 10.3389/fimmu.2022.811733 (PMC8928463; doi:10.3389/fimmu.2022.811733)
Supplement: Supplementary file 5 [file Table_4.xlsx]

## Sheet: Supplementary Table 2
Supplementary Table S4. Effect of HLA allele and epitope mismatching in each locus on gradeII-IV aGVHD, gradeIII-IV aGVHD, and non-relapse mortality.
Category		gradeII-IV aGVHD				gradeIII-IV aGVHD				Non-Relapse Mortality
		n	HR	95%CI	P	n	HR	95%CI	P	n	HR	95%CI	P
HLA-A	Match	9320	1.00			9329	1.00			9232	1.00
	AMM-EM	422	1.14	0.97-1.33	.105	422	1.33	1.05-1.68	.016	419	1.28	1.08-1.52	.006
	AMM-EMM	108	1.80	1.43-2.27	<.001	108	1.72	1.14-2.61	.010	109	1.60	1.20-2.15	.002
HLA-B	Match	9645	1.00			9654	1.00			9551	1.00
	AMM-EM	166	1.29	1.03-1.61	.026	166	1.42	1.02-1.97	.040	169	1.06	0.81-1.39	.682
	AMM-EMM	39	1.22	0.80-1.87	.355	39	0.88	0.40-1.96	.762	40	1.11	0.66-1.86	.694
HLA-C	Match	8035	1.00			8042	1.00			7947	1.00
	AMM-EM	253	1.05	0.86-1.28	.611	254	0.96	0.67-1.39	.842	251	1.23	0.98-1.54	.072
	AMM-EMM	1562	1.28	1.17-1.39	<.001	1563	1.78	1.55-2.05	<.001	1562	1.46	1.32-1.62	<.001
HLA-DRB1	Match	7952	1.00			7959	1.00			7865	1.00
	AMM-EM	197	1.09	0.86-1.39	.473	197	1.07	0.73-1.56	.732	201	0.96	0.73-1.27	.776
	AMM-EMM	1701	1.27	1.09-1.48	.003	1703	1.10	0.86-1.41	.453	1694	1.11	0.94-1.31	.230
HLA-DQB1	Match	7906	1.00			7911	1.00			7814	1.00
	AMM-EM	302	0.98	0.81-1.18	.819	304	0.87	0.62-1.22	.411	307	1.06	0.84-1.33	.630
	AMM-EMM	1642	1.12	0.96-1.32	.151	1644	1.16	0.90-1.49	.259	1639	1.10	0.93-1.30	.274
Abbreviations: aGVHD, acute graft-versus-host disease; AMM, allele mismatch; EM, eplet match; EMM, eplet mismatch
